# **Dietary and Biological Assessment of Omega-3 Status of Collegiate Athletes: A Cross-Sectional Analysis**

**Short Title: Dietary and Biological Assessment of Omega-3 Status of Collegiate Athletes**

Peter P. Ritz, MS, RD, CSSD<sup>1</sup>

Mark B. Rogers DO, CAQSM, FAAFP, FAOASM<sup>1,3</sup>

Jennifer S. Zabinsky MAEd, RD<sup>1,2</sup>

Valisa E. Hedrick PhD, RDN<sup>2</sup>

John A. Rockwell MS, MBA<sup>4</sup>

Ernest Rimer PhD<sup>5,6</sup>

Samantha Kostelnik BS<sup>2</sup>

Matthew W. Hulver PhD<sup>2,7</sup>

Michelle S. Rockwell PhD, RD<sup>2,7</sup>

<sup>1</sup>Athletics Department, Virginia Tech, Blacksburg, VA

<sup>2</sup>Department of Human Nutrition, Foods and Exercise, Virginia Tech, Blacksburg, VA

<sup>3</sup>Edward Via College of Osteopathic Medicine, Blacksburg, VA

<sup>4</sup>Department of Medicine, Carilion Clinic, Roanoke, VA

<sup>5</sup>Department of Exercise & Sport Science, College of Health, University of Utah, Salt Lake City, UT

<sup>6</sup>Athletics Department, University of Utah, Salt Lake City, UT

<sup>7</sup>Center for Transformative Research on Health Behaviors at Fralin Biomedical Research Institute Roanoke, VA

## **Address for correspondence:**

**Michelle Rockwell PhD, RD**

**Human Nutrition, Foods, and Exercise**

**258 Wallace Hall**

**295 West Campus Drive**

**Virginia Tech**

**Blacksburg, VA 24061**

**540-231-9572**

**[msrock@vt.edu](mailto:msrock@vt.edu)**

## Abstract

Omega-3 fatty acids ( $\omega$ -3 FA) play a number of important functions in health and human performance. While previous research has suggested that low  $\omega$ -3 FA status is prevalent in the general population, little information about athletes'  $\omega$ -3 FA status is available. The purpose of this study was to assess the omega-3 fatty acid ( $\omega$ -3 FA) status of collegiate athletes. Dietary  $\omega$ -3 FA intake was evaluated in athletes from nine NCAA Division I institutions (n=1,528, 51% male,  $19.9 \pm 1.4$  years of age, 29 sports represented) via food frequency questionnaire. Omega-3 Index (O3i) was assessed using a dried blood spot sample in a subset of these athletes (n=228). Only 6% (n = 93) of athletes achieved the Academy of Nutrition & Dietetics' recommendation to consume 500 mg of the  $\omega$ -3 FA's docosahexaenoic acid (DHA) and eicosapentaenoic acid (EPA) per day. Use of  $\omega$ -3 FA supplements was reported by 15% (n = 229) of participants. O3i was  $4.33 \pm 0.81\%$ , with zero participants meeting the O3i benchmark of 8% associated with the lowest risk of cardiovascular disease. Every additional weekly serving of fish or seafood was associated with an absolute O3i increase of 0.27%. Overall, sub-optimal  $\omega$ -3 FA status was observed among a large, geographically diverse group of male and female collegiate athletes. These findings may inform interventions aimed at improving  $\omega$ -3 FA status of collegiate athletes. Further research on athlete-specific  $\omega$ -3 FA requirements is needed.

**Key Words:** docosahexanoic acid, eicosapentaenoic acid, alpha-linolenic acid, omega-3 index

## 1 Introduction

2           Omega-3 polyunsaturated fatty acids ( $\omega$ -3 FA), namely long-chain eicosapentaenoic acid  
3 (EPA) and docosahexaenoic acid (DHA), serve as structural components within phospholipid  
4 cell membranes. These  $\omega$ -3 FA have also been shown to play important physiological roles  
5 among the cardiovascular,(1–6) nervous,(7–13) and skeletal muscle systems(14–18), and in the  
6 body’s inflammatory response.(19–26) In athletes,  $\omega$ -3 FA have been associated with the  
7 management of exercise-induced oxidative stress,(19,20,23–25) delayed onset muscle  
8 soreness,(21,22,25,26) oxygen efficiency during aerobic exercise,(2) anaerobic endurance  
9 capacity,(3) and skeletal muscle health.(14–18) The potential neuroprotective role of DHA as  
10 related to concussion and traumatic brain injury (TBI) has also been investigated.(8–13)

11           As essential fats, EPA and DHA must be obtained exogenously because the human body  
12 has limited ability to synthesize these  $\omega$ -3 FA from precursor  $\omega$ -3 FA alpha-linolenic acid  
13 (ALA).(27) Fish are the richest sources of  $\omega$ -3 FA, but there is wide variation in the EPA and  
14 DHA content of these foods (Table 1). (28–32) Also of note, some commonly consumed sources  
15 like tuna and shellfish contain relatively smaller amounts of EPA and DHA and frequent  
16 consumption risks exposure to the effects of mercury. (28–32)

17 **Table 1. Content of Omega-3 Fatty Acids in Common Food Sources**

| <b>FOOD (100g unless otherwise stated)**</b> | <b>EPA+DHA (g)</b> | <b>EPA (g)</b> | <b>DHA (g)</b> | <b>ALA (g)</b> |
|----------------------------------------------|--------------------|----------------|----------------|----------------|
| Cod Liver Oil (1 Tablespoon)                 | 2.43               | 0.938          | 1.492          | 0.042          |
| Salmon                                       | 2.147              | 0.69           | 1.457          | 0.113          |
| Herring                                      | 2.125              | 1.242          | 0.883          | 0.073          |
| Whitefish                                    | 1.612              | 0.406          | 1.206          | 0.235          |
| Sardines                                     | 1                  | 0.4            | 0.6            | 0.5            |
| Bluefish                                     | 0.988              | 0.323          | 0.665          | 0              |
| Trout                                        | 0.936              | 0.259          | 0.677          | 0.199          |
| Swordfish                                    | 0.819              | 0.138          | 0.681          | 0.238          |
| Bass                                         | 0.763              | 0.305          | 0.458          | 0.142          |
| Whiting                                      | 0.518              | 0.283          | 0.235          | 0.013          |
| Flounder                                     | 0.501              | 0.243          | 0.258          | 0.016          |
| Mussels                                      | 0.5                | 0.2            | 0.3            | 0              |
| Lobster                                      | 0.48               | 0.341          | 0.139          | 0.01           |
| Sea Trout                                    | 0.476              | 0.211          | 0.265          | 0.005          |
| Crab                                         | 0.474              | 0.243          | 0.231          | 0.021          |

|                             |       |       |       |       |
|-----------------------------|-------|-------|-------|-------|
| Halibut                     | 0.465 | 0.091 | 0.374 | 0.083 |
| Oysters                     | 0.44  | 0.229 | 0.211 | 0.063 |
| Mackerel                    | 0.401 | 0.174 | 0.227 | 0     |
| Snapper                     | 0.321 | 0.048 | 0.273 | 0     |
| Clams                       | 0.284 | 0.138 | 0.146 | 0.008 |
| Tuna                        | 0.279 | 0.047 | 0.232 | 0.015 |
| Cod                         | 0.276 | 0.103 | 0.173 | 0.003 |
| Haddock                     | 0.238 | 0.076 | 0.162 | 0.003 |
| Catfish                     | 0.237 | 0.1   | 0.137 | 0.096 |
| Scallops                    | 0.189 | 0.086 | 0.103 | 0     |
| Shrimp                      | 0.164 | 0.02  | 0.144 | 0.012 |
| Mahi Mahi                   | 0.139 | 0.026 | 0.113 | 0.006 |
| Tilapia                     | 0.135 | 0.005 | 0.13  | 0.045 |
| Canola Oil (1 Tablespoon)   | 0     | 0     | 0     | 1.2   |
| Flax Seeds (1 Tablespoon)   | 0     | 0     | 0     | 2.2   |
| Chia Seeds (1 Tablespoon)   | 0     | 0     | 0     | 2.673 |
| Flaxseed Oil (1 Tablespoon) | 0     | 0     | 0     | 8.5   |
| Walnuts                     | 0     | 0     | 0     | 3.306 |

18 \*Sorted from highest to lowest content of EPA+DHA

19 \*\*100 g is approximately equivalent to 3.5 ounces

20 \*\*\*  $\omega$ -3 FA values using both USDA Addendum A: EPA and DHA Content of Fish Species and Bowes and Church's Food Values of Portions  
21 Commonly Used as reference.

22 While there is currently no consensus for  $\omega$ -3 FA dietary recommendations (Table  
23 2),(33–36) low  $\omega$ -3 FA intake appears to be prevalent within the general population of North  
24 America, primarily attributed to the limited number of food sources, which includes a short list  
25 of fish and seafood, and infrequent consumption of these  $\omega$ -3 FA rich foods.(28,29,37,38)  
26 Reports of athletes' dietary  $\omega$ -3 FA intake are minimal to date, but Wilson and Madrigal(39)  
27 observed intakes of EPA and DHA below 100 mg daily in a group of 58 National Collegiate  
28 Athletics Association (NCAA) Division I collegiate athletes. While no athlete-specific guidelines  
29 have been established, this is significantly less than the recommendation from the Academy of  
30 Nutrition & Dietetics to consume two fish servings weekly, providing a daily average of 500 mg  
31 EPA + DHA.(33) Little information is available about athletes' habitual use of  $\omega$ -3 FA  
32 supplements.

33 **Table 2. Omega-3 Fatty Acid Dietary Recommendations for the General Public**

|                                  | Year of Publication | Population              | Dietary Recommendation            |
|----------------------------------|---------------------|-------------------------|-----------------------------------|
| Academy of Nutrition & Dietetics | 2014                | General Public (adults) | 500 mg EPA+DHA/ day <sup>34</sup> |

|                                                               |      |                         |                                                                    |
|---------------------------------------------------------------|------|-------------------------|--------------------------------------------------------------------|
| American Heart Association                                    | 2002 | General Public          | At least 2 fish servings weekly (3.5 oz per serving) <sup>35</sup> |
| World Health Organization                                     | 2003 | General public (adults) | 1-2% of energy/ day <sup>36</sup>                                  |
| National Academy of Medicine (formerly Institute of Medicine) | 2005 | Adult men               | 1.6 g/ day of ALA, of which ~10% EPA+DHA <sup>37</sup>             |
|                                                               |      | Adult women             | 1.1 g/ day of ALA, of which ~10% EPA+DHA <sup>37</sup>             |

34

35 In addition to  $\omega$ -3 FA intake,  $\omega$ -3 FA status may be evaluated using the Omega-3 Index  
36 (O3i), which reflects the sum of EPA and DHA in erythrocyte membranes as a percentage of  
37 total erythrocyte fatty acids.(4) Compared to other methods, O3i requires a minimum amount of  
38 blood (i.e., finger stick blood sample), has a low biological variability,(40) is less affected by  
39 acute feedings to better reflect long-term  $\omega$ -3 FA intake,(41) and has been shown to correspond  
40 with  $\omega$ -3 FA concentrations in the heart, brain, and a variety of other tissues.(42,43) An O3i <4%  
41 has been associated with the highest risk for the development of cardiovascular disease; whereas,  
42 4-8% is considered moderate risk and  $\geq$ 8% is the lowest risk.(4-6) Recently, an average O3i of  
43 4.4% was observed among collegiate football athletes at four U.S. universities,(44) however a  
44 large scale assessment of O3i including non-football athletes has not been described in the peer  
45 reviewed published literature, to our knowledge.

46 Prior to 2019, the NCAA considered  $\omega$ -3 FA supplements to be “impermissible”, which  
47 prevented athletic departments from purchasing such supplements for student-athletes.  
48 However, recently amended NCAA legislation reclassified  $\omega$ -3 FA supplements, permitting  
49 athletic departments to provide them to student-athletes.(45) As a result of this rule change,  
50 interest in and availability of  $\omega$ -3 FA supplements has risen. In order to better inform  
51 recommendations and ultimately nutrition interventions, a better understanding of athletes’  $\omega$ -3  
52 FA status is needed. Thus, the purpose of this study was to assess the  $\omega$ -3 FA intake and O3i of  
53 male and female NCAA Division I collegiate student-athletes who participate in a variety of  
54 sports.

55

56

57

58

## 59 **Methods**

### 60 *Study Design*

61 A multi-site, cross-sectional study was designed to assess the  $\omega$ -3 FA dietary intake,  $\omega$ -3  
62 FA supplement use, and O3i of collegiate student-athletes. These assessments were carried out  
63 during the 2018-2019 academic year.

### 64 65 *Participants*

66 Student-athletes from nine NCAA Division I institutions were invited to participate in the  
67 study. In order to achieve geographical diversity, institutions were dispersed throughout the U.S.  
68 (California, Georgia, Illinois, Nebraska, Oregon, Pennsylvania, Texas, Utah and Virginia). All  
69 nine institutions were classified as Power 5 programs. Male and female student-athletes who  
70 were over the age of 18 years and on a current roster for any NCAA Division I sport at one of the  
71 participating institutions were eligible to participate.

### 72 73 *Omega-3 Dietary Assessment*

74 A 26-item food frequency questionnaire (FFQ) validated to assess  $\omega$ -3 FA dietary  
75 intake(39,46) was administered to participants. The FFQ was modified to include demographic  
76 characteristics of participants (sex, age, academic year, and sport) and  $\omega$ -3 FA supplement use.  
77 Within the FFQ, participants reported the frequency of consumption and average portion size for  
78 an extensive list of  $\omega$ -3 FA food sources including fish, shellfish, walnuts, canola oil, flaxseed,  
79 flaxseed oil, and cod liver oil. For participants who indicated that they consumed  $\omega$ -3 FA  
80 supplements, information about brand, form, dosage, and frequency taken was requested.

81 The FFQ results were compiled and analyzed using methodology outlined by Sublette et  
82 al.(46) Previously published databases(30–32) were used as a reference for  $\omega$ -3 FA content of  
83 foods consumed based on source and portion size reported.

### 84 85 *Blood Fatty Acid Analysis*

86 Following completion of the dietary assessment portion of the study, participants were  
87 offered the opportunity to volunteer for a second portion of the study: analysis of blood fatty  
88 acids. For the collection, a single drop of whole blood was sampled and applied to a blood spot  
89 card pre-treated with an antioxidant cocktail. Samples were shipped to a central laboratory

90 (OmegaQuant, Sioux Falls, SD) for a full fatty acid analysis in addition to the calculation of the  
91 O3i using gas chromatography. This methodology is described in detail by Harris and  
92 Polreis.(47) The fatty acid analysis also included EPA, DHA and ALA.

### 93 94 ***Statistical Analysis***

95  
96 Data were analyzed using IBM Statistical Package for the Social Sciences (SPSS) version  
97 26. Descriptive statistics are expressed as means and standard deviations for continuous data,  
98 and frequencies and percentages for categorical data. Data were tested for normality using the  
99 Shapiro-Wilk test. Differences in outcomes between demographic groups were calculated using  
100 analysis of variance (ANOVA) or chi-square tests. Relationships between diet and blood  
101 variables were analyzed using Pearson's correlations. Multiple regression analysis was used to  
102 assess the effects of diet on O3i after adjusting for demographic covariates. Significance was set  
103 at a level of  $p < 0.05$ .

### 104 105 ***Ethical Considerations***

106 This study was approved by the Institutional Review Board of Virginia Tech (IRB# 18-  
107 606) and respective institutional research review committees. Consent for the dietary assessment  
108 portion of the study was inferred based on voluntary completion. Written and informed consent  
109 was provided by participants before starting the blood fatty acid portion of the study.

### 110 111 **Results**

112 In all, 1528 participants (51% males) completed the dietary assessment portion of the  
113 study, from which 298 (55% males) completed the blood analysis portion. Participants  
114 represented 14 different male sports and 16 different female sports from nine institutions.  
115 Descriptive characteristics of participants are shown in Table 3. There were no differences in  
116 demographics between subject cohorts completing the dietary assessment and blood analysis  
117 portions of the study except that the blood cohort did not include ice hockey, ski, soccer,  
118 swimming & diving, and volleyball (male sports) and equestrian, field hockey, golf (female  
119 sports), and the Pennsylvania institution did not participate in the blood analysis (Table 3).

120 **Table 3. Descriptive Characteristics of Participants**

|                                              | <b>Dietary Assessment</b>                                                                                                                                                                                                         | <b>Blood Fatty Acid Analysis</b>                                                                                                                                                                                             | <b>Differences Test Statistic (p-value)</b> |
|----------------------------------------------|-----------------------------------------------------------------------------------------------------------------------------------------------------------------------------------------------------------------------------------|------------------------------------------------------------------------------------------------------------------------------------------------------------------------------------------------------------------------------|---------------------------------------------|
| <b>n</b>                                     | 1,528                                                                                                                                                                                                                             | 298                                                                                                                                                                                                                          |                                             |
| <b>Sex (Male/Female)</b>                     | 780/748                                                                                                                                                                                                                           | 163/115                                                                                                                                                                                                                      | $\chi^2=1.318/ (p=0.251)$                   |
| <b>Age (years; mean <math>\pm</math> sd)</b> | 19.9 $\pm$ 1.4                                                                                                                                                                                                                    | 20.0 $\pm$ 1.3                                                                                                                                                                                                               | F=1.610/ (p=0.646)                          |
| <b>Academic year n (%)</b>                   | <i>Freshman: 442 (28.9%)<br/>Sophomore: 373 (24.4%)<br/>Junior: 377 (24.7%)<br/>Senior: 270 (17.7%)<br/>5<sup>th</sup> year or Graduate: 63 (4.1%)</i>                                                                            | <i>Freshman: 88 (29.5%)<br/>Sophomore: 73 (24.4%)<br/>Junior: 70 (23.5%)<br/>Senior: 58 (19.4%)<br/>5<sup>th</sup> year or Graduate: 9 (3.0%)</i>                                                                            | $\chi^2=18.50/ (p=0.470)$                   |
| <b>Sport n (%)</b>                           | <i>Football: 303 (19.8%)<br/><sup>a</sup> Non-football Male Sport: 477 (31.2%)<br/><sup>b</sup> Female Sport: 748 (49.0%)</i>                                                                                                     | <i>Football: 81 (27.2%)<br/><sup>c</sup> Non-football Male Sport: 82 (27.5%)<br/><sup>d</sup> Female Sport: 115 (38.5%)</i>                                                                                                  | $\chi^2=4.779/ (p=.1912)$                   |
| <b>Region n (5)</b>                          | <i>California: 106 (6.9%)<br/>Georgia: 158 (10.3%)<br/>Illinois: 77 (5.0%)<br/>Nebraska: 211 (13.8%)<br/>Oregon: 111 (7.3%)<br/>Pennsylvania: 61 (4.0%)<br/>Texas: 336 (22.0%)<br/>Utah: 102 (6.7%)<br/>Virginia: 365 (23.9%)</i> | <i>California: 28 (28.6%)<br/>Georgia: 33 (11.1%)<br/>Illinois: 29 (9.7%)<br/>Nebraska: 45 (15.1%)<br/>Oregon: 39 (13.1%)<br/>Pennsylvania: 0 (0.0%)<br/>Texas: 40 (13.4%)<br/>Utah: 42 (14.1%)<br/>Virginia: 43 (14.4%)</i> | $\chi^2=7.003/ (p=.0991)$                   |

121

122 <sup>a</sup> Baseball, Basketball, Cross Country, Golf, Gymnastics, Ice Hockey, Ski, Soccer, Swimming & Diving, Tennis, Track & Field, Volleyball, Wrestling

123 <sup>b</sup> Basketball, Bowling, Cross Country, Cheerleading, Equestrian, Fencing, Field Hockey, Golf, Gymnastics, Lacrosse, Rifle, Rowing, Soccer, Softball, Swimming & Diving, Track & Field

125 <sup>c</sup> Baseball, Basketball, Cross Country, Golf, Gymnastics, Tennis, Track & Field, Wrestling

126 <sup>d</sup> Basketball, Cross Country, Cheerleading Fencing, Gymnastics, Lacrosse, Rifle, Rowing, Soccer, Softball, Swimming & Diving, Track & Field



127 **Diet**

128 A total of 659 participants (45%) reported consuming no fish in the last 6 months, the  
 129 most significant source of DHA and EPA. A total of reported per The AHA’s recommendation  
 130 of consuming at least two or more fish servings weekly was met by 601 participants (39%). (34)  
 131 Comparatively when considering all DHA and EPA sources, fish and/or seafood was consumed  
 132 by 1345 participants (88%) at least once during the previous 6 month timeframe (Figure 1).  
 133 Salmon and shrimp were the only EPA and DHA sources reported to be consumed by more than  
 134 50% of participants (Figure 2). ALA consumption included canola oil (85%), walnuts (53.9%),  
 135 chia (43.6%), flax or flax oil (34.9%), and cod liver oil (3.3%). Use of  $\omega$ -3 FA supplements was  
 136 reported by 229 participants (15%). Of supplement-users, 153 (67%) purchased the supplement  
 137 on their own, while 76 (33%) received supplements via their respective athletic program. Most  
 138 participants provided no response to brand, type, and dose of  $\omega$ -3 FA supplements consumed.

139 In comparison to previously reported dietary intake recommendations (Table 1), only 6%  
 140 of participants consumed at least 500 mg EPA + DHA/day as advised by the Academy of  
 141 Nutrition and Dietetics(33) and 4% met the National Academy of Medicine’s (formerly Institute  
 142 of Medicine) recommendation of 1.6 g ALA (men) or 1.1 g ALA (women) with 10% coming  
 143 from EPA + DHA.(36) Dietary consumption of EPA, DHA, EPA + DHA, and ALA are shown  
 144 in Table 4.

145 **Table 4. Dietary Consumption of Omega-3 Fatty Acids (n=1528)**

|           | Total Daily Intake (mg) | Sex            |                  | p-value | Sport              |                        | p-value |
|-----------|-------------------------|----------------|------------------|---------|--------------------|------------------------|---------|
|           |                         | Male<br>n= 780 | Female<br>n= 748 |         | Football<br>n= 303 | Non-football<br>n= 477 |         |
| EPA       | 46.8 +/- 86.9           | 53.4           | 40.4             | .0042** | 57.3               | 43.6                   | 0.0198* |
| DHA       | 94.8 +/- 164.9          | 106.4          | 83.9             | .0091** | 111.8              | 89.7                   | 0.0467* |
| ALA       | 571.8 +/- 1151.5        | 530.4          | 626.6            | .0281*  | 622.7              | 587.8                  | 0.6621  |
| EPA + DHA | 141.7 +/- 250.6         | 159.8          | 124.3            | .0068** | 169.1              | 133.4                  | 0.0342* |

146

147 **Blood**

148 Result of blood EPA, DHA, ALA and O3i analyses are shown in Table 5. O3i ranged  
 149 from 2.25 to 7.23% (Figure 3), with 114 (38%) in the high risk category, 184 (62%) in the  
 150 moderate risk category, and 0 (0%) in the low risk category. There were no significant  
 151 differences in blood measures based on sex (Figure 4), sport (Figure 5), location, age, or  
 152 academic year.

153 **Table 5. Blood Fatty Acid Analysis Results (n= 298)**

|                     | Blood Fatty Acids (%) | Sex   |        | p-value  | Sport    |              | p-value |
|---------------------|-----------------------|-------|--------|----------|----------|--------------|---------|
|                     |                       | Male  | Female |          | Football | Non-football |         |
| EPA                 | 0.45 ± 0.19           | 53.4  | 40.4   | p= 0.704 | 57.3     | 43.6         | 0.738   |
| DHA                 | 2.19 ± 0.59           | 106.4 | 83.9   | p= 0.699 | 111.8    | 89.7         | 0.718   |
| ALA                 | 0.49 ± 0.19           | 530.4 | 626.6  | p= 0.588 | 622.7    | 587.8        | 0.820   |
| Omega-3 Index (O3i) | 4.3 ± 0.81            | 4.3   | 4.4    | p= 0.905 | 4.4      | 4.4          | 0.942   |

154

155 **Relationship Between Diet and Blood Measures**

156 Dietary intake of both EPA and DHA were positively correlated with blood EPA, DHA,  
 157 and O3i (Table 6). Dietary ALA intake had no correlation with blood levels of EPA, DHA, ALA  
 158 or O3i (Table 6).

159 **Table 6. Diet and Blood Fatty Acid Correlations Table**

|                       | Diet EPA | Diet DHA | Diet EPA + DHA | Diet ALA | Diet Total ω-3 | Blood EPA | Blood DHA | Blood ALA | Blood ω-3 Index |
|-----------------------|----------|----------|----------------|----------|----------------|-----------|-----------|-----------|-----------------|
| <b>Diet EPA</b>       | 1        |          |                |          |                |           |           |           |                 |
| <b>Diet DHA</b>       | .977**   | 1        |                |          |                |           |           |           |                 |
| <b>Diet EPA + DHA</b> | 0.990**  | 0.997**  | 1              |          |                |           |           |           |                 |
| <b>Diet ALA</b>       | 0.134    | 0.154    | 0.148          | 1        |                |           |           |           |                 |
| <b>Diet Total ω-3</b> | 0.332*   | 0.552*   | 0.347*         | 0.979**  | 1              |           |           |           |                 |
| <b>Blood EPA</b>      | 0.342*   | 0.334*   | 0.338*         | 0.296    | 0.339*         | 1         |           |           |                 |

|                                          |            |            |            |       |            |             |             |        |   |
|------------------------------------------|------------|------------|------------|-------|------------|-------------|-------------|--------|---|
| <b>Blood DHA</b>                         | 0.397<br>* | 0.404<br>* | 0.403<br>* | 0.214 | .273       | .402 *      | 1           |        |   |
| <b>Blood ALA</b>                         | 0.072      | 0.080      | 0.078      | 0.090 | 0.098      | 0.072       | -0.122      | 1      |   |
| <b>Blood <math>\omega</math>-3 Index</b> | 0.437<br>* | 0.441<br>* | 0.442<br>* | 0.271 | 0.332<br>* | 0.648<br>** | 0.958<br>** | -0.079 | 1 |

Note: \* $p < 0.05$ , \*\* $p < 0.01$

After controlling for location, sex, age, class year and sport (football vs. non-football), frequency of seafood consumption was a significant predictor of O3i ( $R^2 = .3701$ ,  $p < 0.01$ ). Each additional serving of seafood was associated with a O3i increase of 0.27% (Figure 5). Participants who reported taking  $\omega$ -3 FA supplements had significantly higher O3i compared with those not taking supplements (4.7 vs. 3.7%, respectively;  $p < 0.05$ ). Participants who met the Academy of Nutrition and Dietetics' recommendation of 500 mg EPA+DHA per day had a higher O3i on average compared to those who consumed less than the 500 mg EPA+DHA recommendation (5.4% vs. 4.3%,  $p < 0.05$ ).

## Discussion

The primary goal of this study was to describe the  $\omega$ -3 FA status of collegiate athletes in the U.S. Our findings indicate that collegiate athletes are not meeting dietary recommendations for  $\omega$ -3 FA and have sub-optimal O3i as compared to currently proposed cardiovascular benchmarks. To our knowledge, this is the first large scale assessment of  $\omega$ -3 FA status of male and female collegiate athletes from a variety of sports.

While the majority of collegiate athletes participating in the present study did not meet current dietary  $\omega$ -3 FA recommendations (Table 1), similar to previous observations(44,46) it is important to note that these guidelines are not specific to athletes. Further research is needed to establish athlete-specific recommendations, especially taking into consideration the physiological implications of advanced levels of training on metabolism and the inflammatory response. (48–50) For example, lower average O3i was observed among non-elite runners with greater training mileage compared to those with lesser running mileage.(48)

Given the pattern of low  $\omega$ -3 FA intake observed in collegiate athletes,(39,44) clinicians should consider nutritional interventions aimed at improving  $\omega$ -3 FA status. One strategy could be increasing consumption of fish and seafood, the richest sources of EPA + DHA, as nearly half

188 of participants reported no fish consumption in the last 6 months. In recent years, the NCAA has  
189 seen significant changes in terms of the feeding opportunities available for athletes as a result of  
190 the deregulation of meal restrictions on Division I collegiate student-athletes in 2014.(51) Based  
191 on our findings, inclusion of  $\omega$ -3 FA-rich sources in provided meals is advisable. Capitalizing  
192 on popular fish and seafood sources (salmon, shrimp, crab, tuna, and tilapia were consumed the  
193 most in the current study) may be beneficial. Those involved in nutrition programming and meal  
194 planning should also recognize that plant-based sources of  $\omega$ -3 FA are rich in ALA rather than  
195 EPA + DHA and that the conversion of ALA to EPA + DHA is minimal. (27) The observed lack  
196 of correlation between dietary ALA and blood measures of EPA, DHA and O3i, is also  
197 consistent with previous findings (39,46)

198 No participant in the current study, including those who consumed fish or seafood twice  
199 or more per week, had an O3i of 8%, the level associated with lowest cardiovascular disease  
200 risk.(4–6) Thus, achieving optimal  $\omega$ -3 FA status through diet alone may be difficult and it is  
201 plausible that athletes may actually have higher needs than the general population. The use of  $\omega$ -  
202 3 FA supplements is another strategy for improving  $\omega$ -3 FA status, and has been discussed as a  
203 potentially helpful nutritional tool for athletes.(52) A small percentage of participants reported  
204  $\omega$ -3 FA supplement use but almost none were able to provide information about brand, form,  
205 dosage, and frequency of supplements used. The recent NCAA guidelines changes(45) present  
206 an opportunity to more readily provide  $\omega$ -3 FA when appropriate for student-athletes, and to do  
207 so in a safe, controlled, and monitored fashion.

208 The sub-optimal O3i observed for in our study (4.3%) was similar to previous  
209 observations,(39,44,53,54) and did not differ based on sex or sport. While further research is  
210 needed to investigate potential differences in needs between athletes of different sex and sport,  
211 these we observed collegiate athletes collectively have low  $\omega$ -3 FA status. Higher consumption  
212 of EPA+DHA observed in males and football participants compared to their counterparts did not  
213 translate to higher O3i values. This might suggest external factors such as higher average body  
214 mass, higher caloric needs and availability of athletic department nutrition resources drove the  
215 observed increases in EPA+DHA intake and was not significant enough to impact blood status.  
216 To our knowledge, no U.S.-based athletes have been documented in the peer reviewed literature  
217 as having O3i greater than 8%,(39,44) the proposed benchmark for optimal cardiovascular

218 health.(4–6) Given the increasing risk of cardiovascular disease reported among athletes,(55) a  
219 focus on improved O3i is warranted. Although O3i is positively correlated with  $\omega$ -3 FA  
220 concentration of a variety of tissues, and  $\omega$ -3 FA status is associated with a number of health and  
221 performance factors for athletes,(2,3,8–13,15–24,26) target O3i for non-cardiovascular  
222 conditions is not well-established. Continuing research is needed to investigate the impact of  
223 O3i on athlete health and performance measures.

224

### 225 *Strengths & Limitations*

226 Collaboration with a diverse group of Power 5 institutions enabled us to study a large  
227 sample of athletes from nearly every NCAA sport with varying dietary habits and available  
228 resources. Further, given the timing of the NCAA legislation changes in relation to the timeline  
229 of our assessment, this investigation also serves as a baseline for  $\omega$ -3 FA intake and  $\omega$ -3 FA  
230 supplement use among collegiate athletes. Finally, our results parallel those of others who have  
231 observed a positive correlation between dietary EPA and DHA intake and O3i.(56–58) This  
232 suggests that the FFQ we used(39,46) was a reliable measure of  $\omega$ -3 FA intake. This FFQ  
233 provides a cost-effective method for assessing  $\omega$ -3 FA status in clinical situations where blood  
234 assessment may not be practically or financially warranted.

235 The study does have some limitations, however. For example, fish and seafood vary in  
236 nutritional content based on a number of factors, including variety consumed, location, and time  
237 of year. Our assessment did not account for this variation. Additionally, we did not collect data  
238 related to race/ethnicity, height, and body weight in effort to assure anonymity of participants,  
239 but this information may have been insightful in data analysis. Overall, the lack of universally  
240 accepted dietary recommendations and blood measure standards provided an additional obstacle  
241 in terms of interpreting our results, which should be a primary motive for future research.

242

### 243 *Conclusions*

244 Prior to the change in NCAA legislation change related to  $\omega$ -3 FA supplementation, we  
245 observed sub-optimal omega-3 status in NCAA Division I athletes based on both dietary and  
246 blood assessments. These results serve to inform future nutritional interventions aimed at  
247 improving  $\omega$ -3 FA status among athletes. Results also provide a baseline in order to measure the  
248 impact of nutrition interventions created as a result of this legislation change.

249

250 *Acknowledgements*

251 The authors would like to thank dietitians and sport scientists at the nine participating institutions  
252 who assisted in the data collection process. This study was funded, in part, by the Collegiate and  
253 Professional Sports Dietitians Association Research Award.

254

255

256

257

258

259

260

261

262

263

264

265

266

267

268

269

270

271

272 References

- 273 1. Arterburn LM, Hall EB, Oken H. Distribution, interconversion, and dose response of n-3 fatty acids  
274 in humans. *Am J Clin Nutr.* 2006;83(6 Suppl):1467S-1476S.
- 275 2. Hingley L, Macartney MJ, Brown MA, McLennan PL, Peoples GE. DHA-rich Fish Oil Increases the  
276 Omega-3 Index and Lowers the Oxygen Cost of Physiologically Stressful Cycling in Trained  
277 Individuals. *Int J Sport Nutr Exerc Metab.* 2017 Aug;27(4):335-43.
- 278 3. Gravina L, Brown FF, Alexander L, Dick J, Bell G, Witard OC, et al. n-3 Fatty Acid Supplementation  
279 During 4 Weeks of Training Leads to Improved Anaerobic Endurance Capacity, but not Maximal  
280 Strength, Speed, or Power in Soccer Players. *Int J Sport Nutr Exerc Metab.* 2017 Aug;27(4):305-13.
- 281 4. Harris WS, Von Schacky C. The Omega-3 Index: a new risk factor for death from coronary heart  
282 disease? *Prev Med.* 2004 Jul;39(1):212-20.
- 283 5. Harris WS. Omega-3 fatty acids and cardiovascular disease: a case for omega-3 index as a new risk  
284 factor. *Pharmacol Res.* 2007 Mar;55(3):217-23.
- 285 6. Harris WS, Del Gobbo L, Tintle NL. The Omega-3 Index and relative risk for coronary heart disease  
286 mortality: Estimation from 10 cohort studies. *Atherosclerosis.* 2017;262:51-4.
- 287 7. Youdim KA, Martin A, Joseph JA. Essential fatty acids and the brain: possible health implications.  
288 *Int J Dev Neurosci Off J Int Soc Dev Neurosci.* 2000 Aug;18(4-5):383-99.
- 289 8. Mills JD, Hadley K, Bailes JE. Dietary supplementation with the omega-3 fatty acid  
290 docosahexaenoic acid in traumatic brain injury. *Neurosurgery.* 2011 Feb;68(2):474-81; discussion  
291 481.
- 292 9. Amen DG, Wu JC, Taylor D, Willeumier K. Reversing brain damage in former NFL players:  
293 implications for traumatic brain injury and substance abuse rehabilitation. *J Psychoact Drugs.* 2011  
294 Mar;43(1):1-5.
- 295 10. Barrett EC, McBurney MI, Ciappio ED.  $\omega$ -3 fatty acid supplementation as a potential therapeutic  
296 aid for the recovery from mild traumatic brain injury/concussion. *Adv Nutr Bethesda Md.* 2014  
297 May;5(3):268-77.
- 298 11. Lewis MD. Concussions, Traumatic Brain Injury, and the Innovative Use of Omega-3s. *J Am Coll*  
299 *Nutr.* 2016;35(5):469-75.
- 300 12. Oliver JM, Jones MT, Kirk KM, Gable DA, Repshas JT, Johnson TA, et al. Effect of Docosahexaenoic  
301 Acid on a Biomarker of Head Trauma in American Football. *Med Sci Sports Exerc.* 2016  
302 Jun;48(6):974-82.
- 303 13. Oliver JM, Anzalone AJ, Turner SM. Protection Before Impact: the Potential Neuroprotective Role  
304 of Nutritional Supplementation in Sports-Related Head Trauma. *Sports Med Auckl NZ.*  
305 2018;48(Suppl 1):39-52.

- 306 14. Watkins BA, Li Y, Lippman HE, Seifert MF. Omega-3 polyunsaturated fatty acids and skeletal health.  
307 Exp Biol Med Maywood NJ. 2001 Jun;226(6):485–97.
- 308 15. Smith GI, Atherton P, Reeds DN, Mohammed BS, Rankin D, Rennie MJ, et al. Omega-3  
309 polyunsaturated fatty acids augment the muscle protein anabolic response to hyperinsulinaemia-  
310 hyperaminoacidaemia in healthy young and middle-aged men and women. Clin Sci Lond Engl 1979.  
311 2011 Sep;121(6):267–78.
- 312 16. McGlory C, Wardle SL, Macnaughton LS, Witard OC, Scott F, Dick J, et al. Fish oil supplementation  
313 suppresses resistance exercise and feeding-induced increases in anabolic signaling without  
314 affecting myofibrillar protein synthesis in young men. Physiol Rep. 2016 Mar;4(6).
- 315 17. McGlory C, Gorissen SHM, Kamal M, Bahniwal R, Hector AJ, Baker SK, et al. Omega-3 fatty acid  
316 supplementation attenuates skeletal muscle disuse atrophy during two weeks of unilateral leg  
317 immobilization in healthy young women. FASEB J. 2019 Mar;33(3):4586–97.
- 318 18. Tachtsis B, Camera D, Lacham-Kaplan O. Potential Roles of n-3 PUFAs during Skeletal Muscle  
319 Growth and Regeneration. Nutrients. 2018 Mar 5;10(3).
- 320 19. Lee TH, Hoover RL, Williams JD, Sperling RI, Ravalese J, Spur BW, et al. Effect of dietary enrichment  
321 with eicosapentaenoic and docosahexaenoic acids on in vitro neutrophil and monocyte leukotriene  
322 generation and neutrophil function. N Engl J Med. 1985 May 9;312(19):1217–24.
- 323 20. Calder PC. Polyunsaturated fatty acids and inflammatory processes: New twists in an old tale.  
324 Biochimie. 2009 Jun;91(6):791–5.
- 325 21. Tartibian B, Maleki BH, Abbasi A. The effects of ingestion of omega-3 fatty acids on perceived pain  
326 and external symptoms of delayed onset muscle soreness in untrained men. Clin J Sport Med Off J  
327 Can Acad Sport Med. 2009 Mar;19(2):115–9.
- 328 22. Jouris KB, McDaniel JL, Weiss EP. The Effect of Omega-3 Fatty Acid Supplementation on the  
329 Inflammatory Response to eccentric strength exercise. J Sports Sci Med. 2011;10(3):432–8.
- 330 23. Gray P, Chappell A, Jenkinson AM, Thies F, Gray SR. Fish oil supplementation reduces markers of  
331 oxidative stress but not muscle soreness after eccentric exercise. Int J Sport Nutr Exerc Metab.  
332 2014 Apr;24(2):206–14.
- 333 24. Corder KE, Newsham KR, McDaniel JL, Ezekiel UR, Weiss EP. Effects of Short-Term  
334 Docosahexaenoic Acid Supplementation on Markers of Inflammation after Eccentric Strength  
335 Exercise in Women. J Sports Sci Med. 2016 Mar;15(1):176–83.
- 336 25. Ochi E, Tsuchiya Y. Eicosapentaenoic Acid (EPA) and Docosahexaenoic Acid (DHA) in Muscle  
337 Damage and Function. Nutrients. 2018 29;10(5).
- 338 26. Tinsley GM, Gann JJ, Huber SR, Andre TL, La Bounty PM, Bowden RG, et al. Effects of Fish Oil  
339 Supplementation on Postresistance Exercise Muscle Soreness. J Diet Suppl. 2017 Jan 2;14(1):89–  
340 100.



- 341 27. Burdge GC, Wootton SA. Conversion of alpha-linolenic acid to eicosapentaenoic, docosapentaenoic  
342 and docosahexaenoic acids in young women. *Br J Nutr.* 2002 Oct;88(4):411–20.
- 343 28. Cholewski M, Tomczykowa M, Tomczyk M. A Comprehensive Review of Chemistry, Sources and  
344 Bioavailability of Omega-3 Fatty Acids. *Nutrients* [Internet]. 2018 Nov 4 [cited 2019 Nov 22];10(11).  
345 Available from: <https://www.ncbi.nlm.nih.gov/pmc/articles/PMC6267444/>
- 346 29. Mori TA. Marine OMEGA-3 fatty acids in the prevention of cardiovascular disease. *Fitoterapia.*  
347 2017 Nov 1;123:51–8.
- 348 30. Diet History Questionnaire: Development of the DHQ Nutrient Database [Internet]. [cited 2019  
349 Nov 25]. Available from: <https://epi.grants.cancer.gov/DHQ/database/>
- 350 31. US Department of Agriculture, Agricultural Research Service. USDA National Nutrient Database for  
351 Standard Reference, Release 22 [Internet]. Nutrient Data Laboratory Home Page. 2009. Available  
352 from: [/ba/bhnrc/ndl](#)
- 353 32. Pennington JAT. *Bowes & Church's food values of portions commonly used* /. Lippincott Williams &  
354 Wilkins; 2005.
- 355 33. Vannice G, Rasmussen H. Position of the Academy of Nutrition and Dietetics: Dietary Fatty Acids  
356 for Healthy Adults. *J Acad Nutr Diet.* 2014 Jan 1;114(1):136–53.
- 357 34. Fish and Omega-3 Fatty Acids [Internet]. [www.heart.org](http://www.heart.org). [cited 2019 Sep 29]. Available from:  
358 [https://www.heart.org/en/healthy-living/healthy-eating/eat-smart/fats/fish-and-omega-3-fatty-](https://www.heart.org/en/healthy-living/healthy-eating/eat-smart/fats/fish-and-omega-3-fatty-acids)  
359 [acids](https://www.heart.org/en/healthy-living/healthy-eating/eat-smart/fats/fish-and-omega-3-fatty-acids)
- 360 35. WHO | Diet, nutrition and the prevention of chronic diseases [Internet]. WHO. [cited 2019 Sep 30].  
361 Available from: <https://www.who.int/dietphysicalactivity/publications/trs916/en/>
- 362 36. Office of Dietary Supplements - Omega-3 Fatty Acids [Internet]. [cited 2019 Sep 29]. Available  
363 from: <https://ods.od.nih.gov/factsheets/Omega3FattyAcids-HealthProfessional/>
- 364 37. Stark KD, Van Elswyk ME, Higgins MR, Weatherford CA, Salem N. Global survey of the omega-3  
365 fatty acids, docosahexaenoic acid and eicosapentaenoic acid in the blood stream of healthy adults.  
366 *Prog Lipid Res.* 2016 Jul;63:132–52.
- 367 38. Blasbalg TL, Hibbeln JR, Ramsden CE, Majchrzak SF, Rawlings RR. Changes in consumption of  
368 omega-3 and omega-6 fatty acids in the United States during the 20th century. *Am J Clin Nutr.*  
369 2011 May;93(5):950–62.
- 370 39. Wilson PB, Madrigal LA. Associations Between Whole Blood and Dietary Omega-3 Polyunsaturated  
371 Fatty Acid Levels in Collegiate Athletes. *Int J Sport Nutr Exerc Metab.* 2016 Dec;26(6):497–505.
- 372 40. Harris WS, Thomas RM. Biological variability of blood omega-3 biomarkers. *Clin Biochem.* 2010  
373 Feb;43(3):338–40.

- 374 41. Harris WS, Varvel SA, Pottala JV, Warnick GR, McConnell JP. Comparative effects of an acute dose  
375 of fish oil on omega-3 fatty acid levels in red blood cells versus plasma: implications for clinical  
376 utility. *J Clin Lipidol*. 2013 Oct;7(5):433–40.
- 377 42. Fenton JI, Gurzell EA, Davidson EA, Harris WS. Red blood cell PUFAs reflect the phospholipid PUFA  
378 composition of major organs. *Prostaglandins Leukot Essent Fatty Acids*. 2016;112:12–23.
- 379 43. Gurzell EA, Wiesinger JA, Morkam C, Hemmrich S, Harris WS, Fenton JI. Is the omega-3 index a  
380 valid marker of intestinal membrane phospholipid EPA+DHA content? *Prostaglandins Leukot*  
381 *Essent Fatty Acids*. 2014 Sep;91(3):87–96.
- 382 44. Anzalone A, Carbuhn A, Jones L, Gallop A, Smith A, Johnson P, et al. The Omega-3 Index in National  
383 Collegiate Athletic Association Division I Collegiate Football Athletes. *J Athl Train*. 2019  
384 Jan;54(1):7–11.
- 385 45. Rohlman A, Zeller L. 2018-2019 NCAA Division I Manual, Article 16.5.2.8 Nutritional Supplements.  
386 [Internet]. The National Collegiate Athletic Association; 2018. Available from:  
387 <https://web3.ncaa.org/lstdbi/reports/getReport/90012>.
- 388 46. Sublette ME, Segal-Isaacson CJ, Cooper TB, Fekri S, Vanegas N, Galfalvy HC, et al. Validation of a  
389 food frequency questionnaire to assess intake of n-3 polyunsaturated fatty acids in subjects with  
390 and without major depressive disorder. *J Am Diet Assoc*. 2011 Jan;111(1):117-123 e1-2.
- 391 47. Harris W, Polreis J. Measurement of the Omega-3 Index in Dried Blood Spots. *Ann Clin Lab Res*.  
392 2016 Jan 1;04.
- 393 48. Davinelli S, Corbi G, Righetti S, Casiraghi E, Chiappero F, Martegani S, et al. Relationship Between  
394 Distance Run Per Week, Omega-3 Index, and Arachidonic Acid (AA)/Eicosapentaenoic Acid (EPA)  
395 Ratio: An Observational Retrospective Study in Non-elite Runners. *Front Physiol*. 2019;10:487.
- 396 49. Nikolaidis MG, Mougios V. Effects of exercise on the fatty-acid composition of blood and tissue  
397 lipids. *Sports Med Auckl NZ*. 2004;34(15):1051–76.
- 398 50. Tepsic J, Vucic V, Arsic A, Blazencic-Mladenovic V, Mazic S, Glibetic M. Plasma and erythrocyte  
399 phospholipid fatty acid profile in professional basketball and football players. *Eur J Appl Physiol*.  
400 2009 Oct 1;107(3):359–65.
- 401 51. NCAA Deregulation of Feeding [Internet]. CPSDA | SportsRd.org | Collegiate & Professional Sports  
402 Dietitians Association. [cited 2019 Dec 1]. Available from: [https://www.sportsrd.org/ncaa-](https://www.sportsrd.org/ncaa-deregulation-of-feeding/)  
403 [deregulation-of-feeding/](https://www.sportsrd.org/ncaa-deregulation-of-feeding/)
- 404 52. Maughan RJ, Burke LM, Dvorak J, Larson-Meyer DE, Peeling P, Phillips SM, et al. IOC consensus  
405 statement: dietary supplements and the high-performance athlete. *Br J Sports Med*. 2018  
406 Apr;52(7):439–55.
- 407 53. von Schacky C, Kemper M, Haslbauer R, Halle M. Low Omega-3 Index in 106 German elite winter  
408 endurance athletes: a pilot study. *Int J Sport Nutr Exerc Metab*. 2014 Oct;24(5):559–64.

- 409 54. Drobic F, Rueda F, Pons V, Banquells M, Cordobilla B, Domingo JC. Erythrocyte Omega-3 Fatty  
410 Acid Content in Elite Athletes in Response to Omega-3 Supplementation: A Dose-Response Pilot  
411 Study. *J Lipids*. 2017;2017:1472719.
- 412 55. Kim JH, Zafonte R, Pascuale-Leon A, Nadler LM, Weisskopf M, Speizer FE, et al. American-Style  
413 Football and Cardiovascular Health. *J Am Heart Assoc Cardiovasc Cerebrovasc Dis [Internet]*. 2018  
414 Apr 4 [cited 2019 Sep 24];7(8). Available from:  
415 <https://www.ncbi.nlm.nih.gov/pmc/articles/PMC6015395/>
- 416 56. Block RC, Harris WS, Pottala JV. Clinical Investigation: Determinants of Blood Cell Omega-3 Fatty  
417 Acid Content. *Open Biomark J [Internet]*. 2008 Aug 29 [cited 2019 Sep 24];1(1). Available from:  
418 <https://openbiomarkerjournal.com/VOLUME/1/PAGE/1/>
- 419 57. Harris WS, Pottala JV, Sands SA, Jones PG. Comparison of the effects of fish and fish-oil capsules on  
420 the n 3 fatty acid content of blood cells and plasma phospholipids. *Am J Clin Nutr*. 2007  
421 Dec;86(6):1621–5.
- 422 58. Sands SA, Reid KJ, Windsor SL, Harris WS. The impact of age, body mass index, and fish intake on  
423 the EPA and DHA content of human erythrocytes. *Lipids*. 2005;40(4):343.
- 424

**Figure 1. Frequency of Fish and Seafood Consumption During the Previous 6 Months (n=1528)**

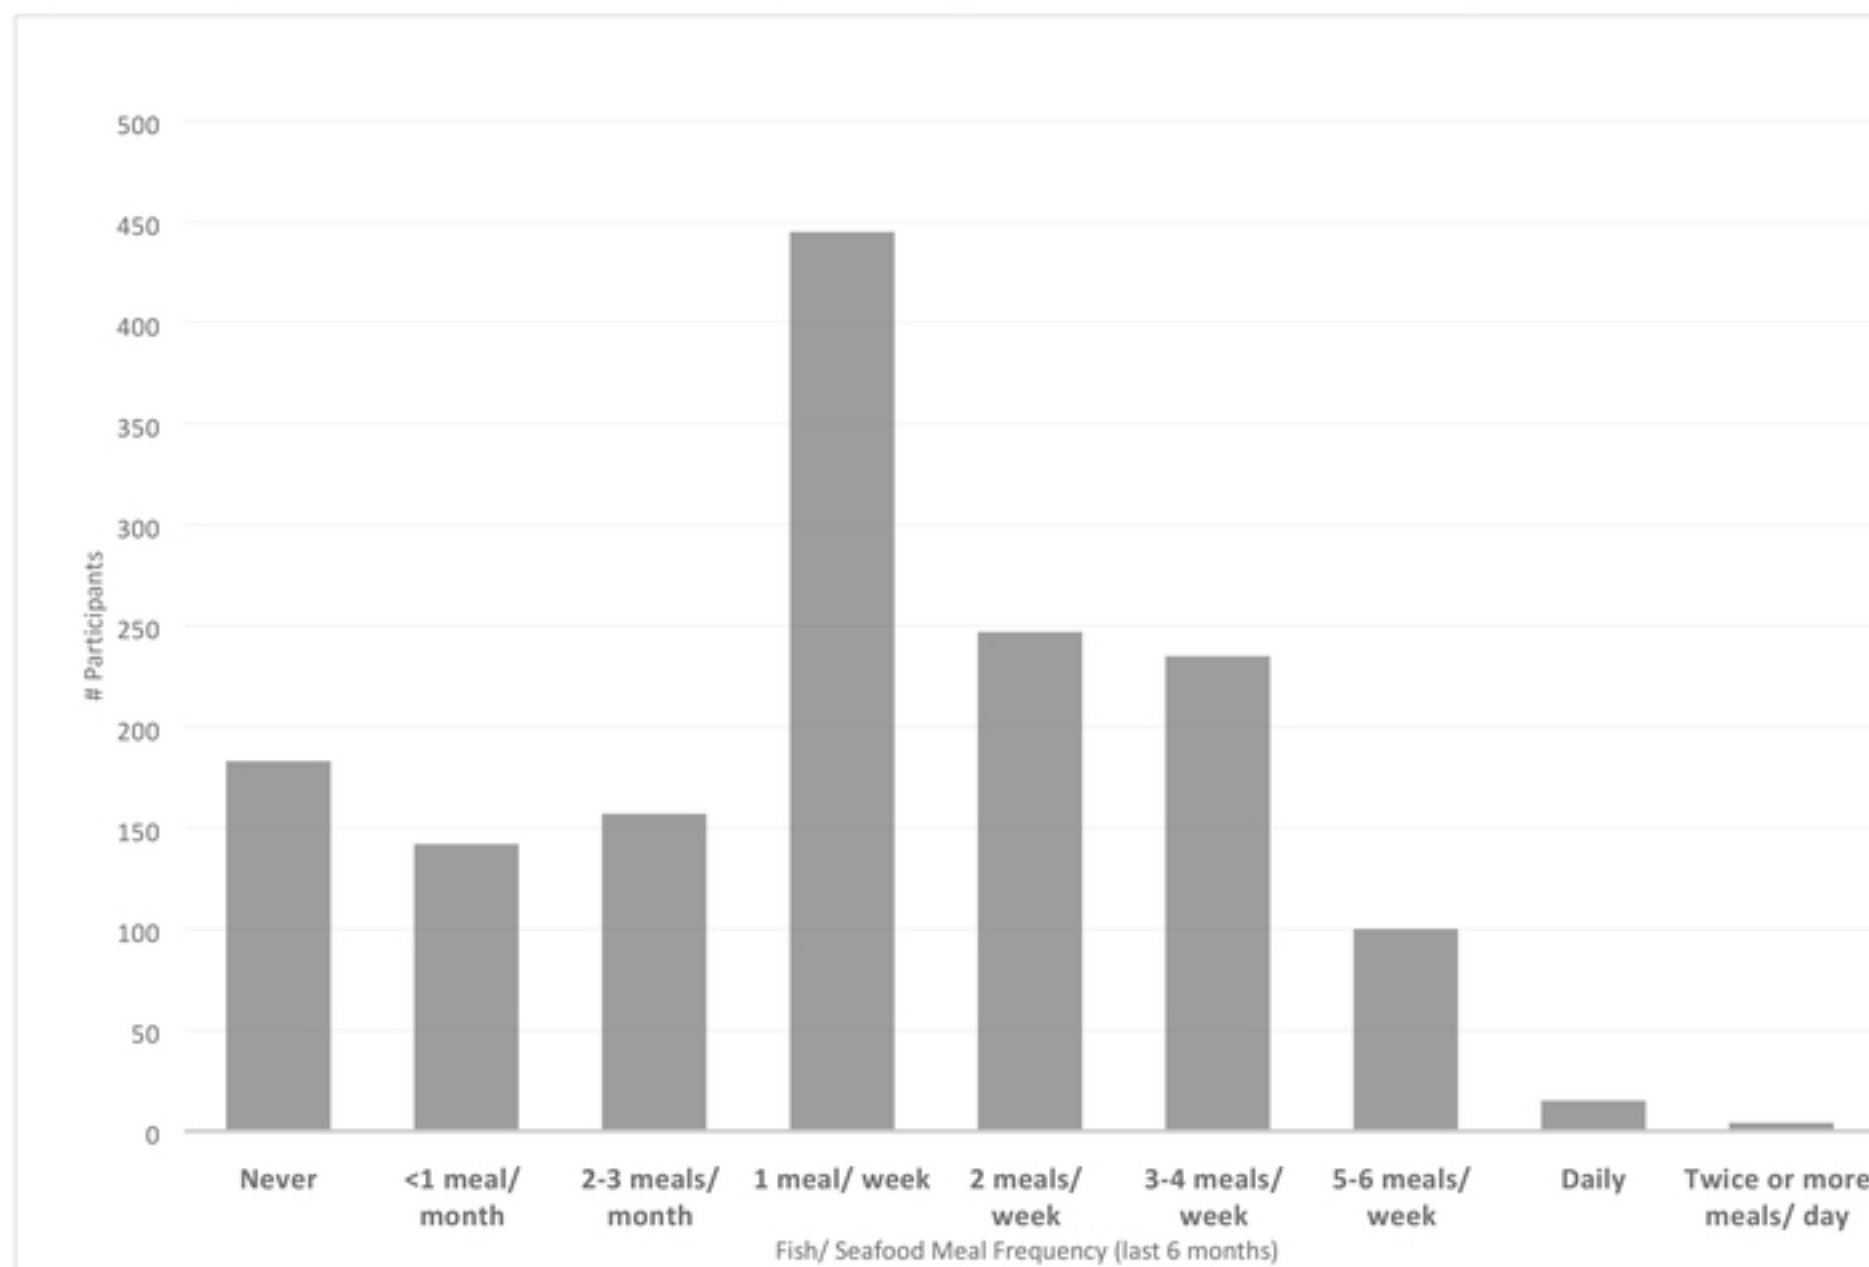

**Figure 2. Sources of Fish and Seafood Consumed During the Previous 6 Months (n=1528)**

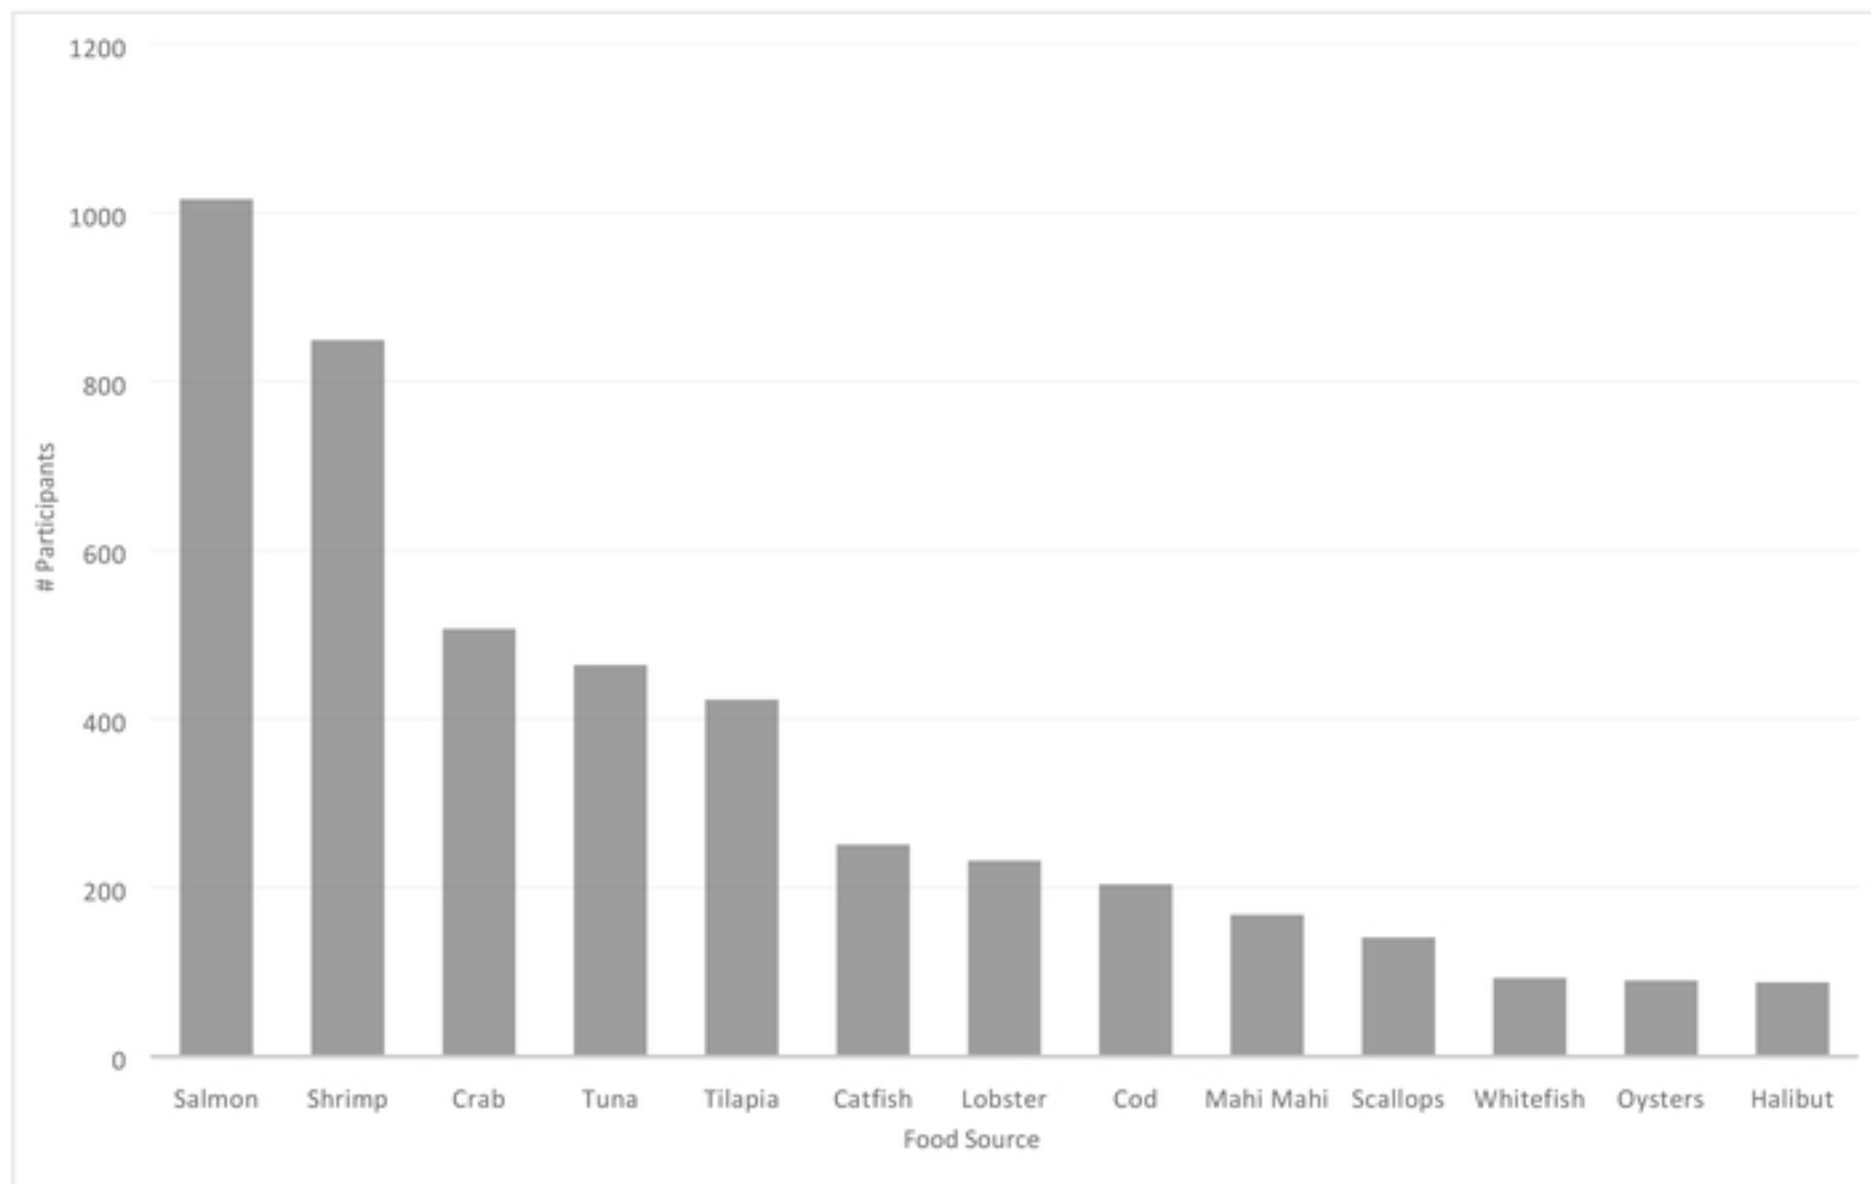

**Figure 3. Distribution of Omega-3 Index Results (n=298)**

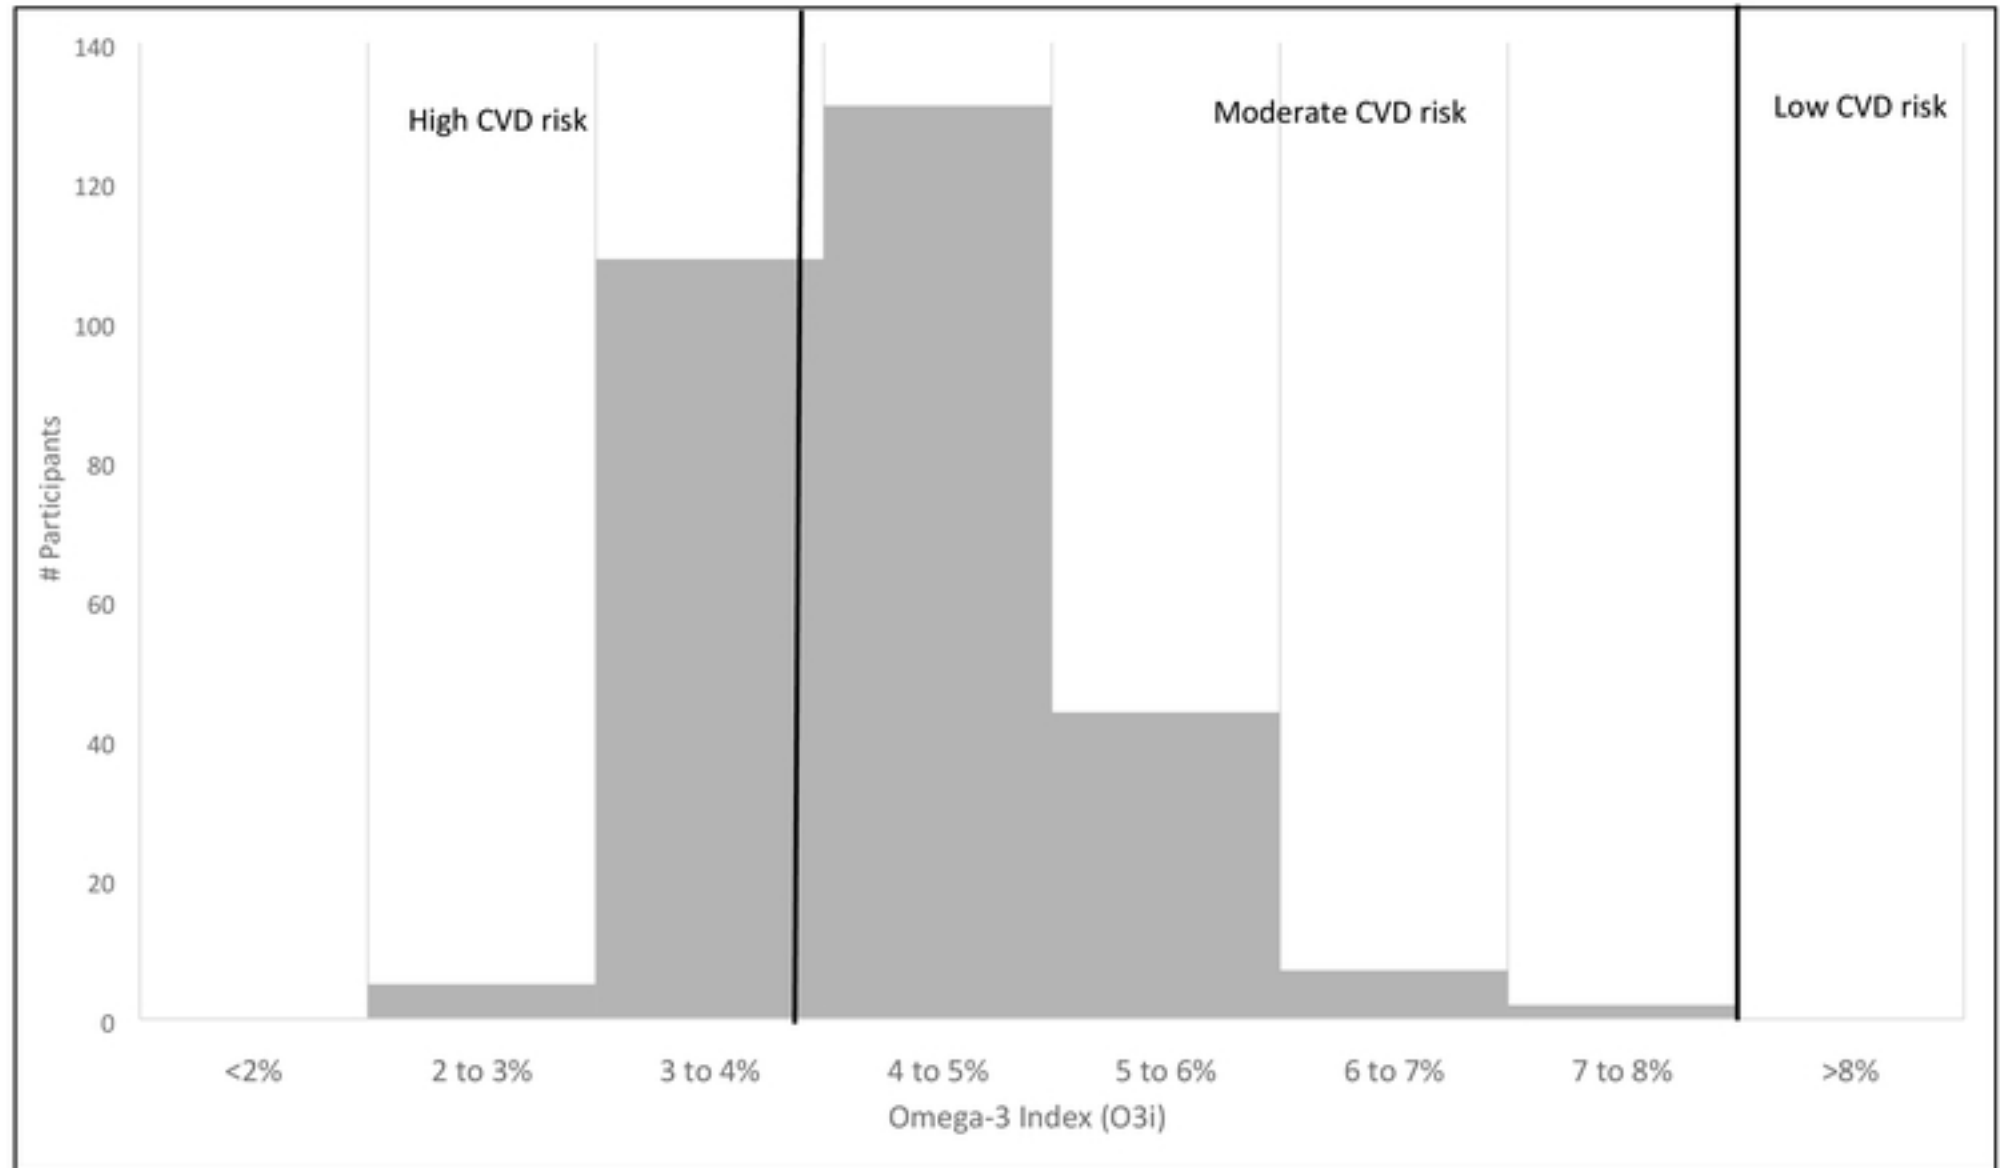

Note. Ranges associated with risk for development of cardiovascular disease. <sup>26,31,32</sup>

**Figure 4. Average Omega-3 Index between Sexes**

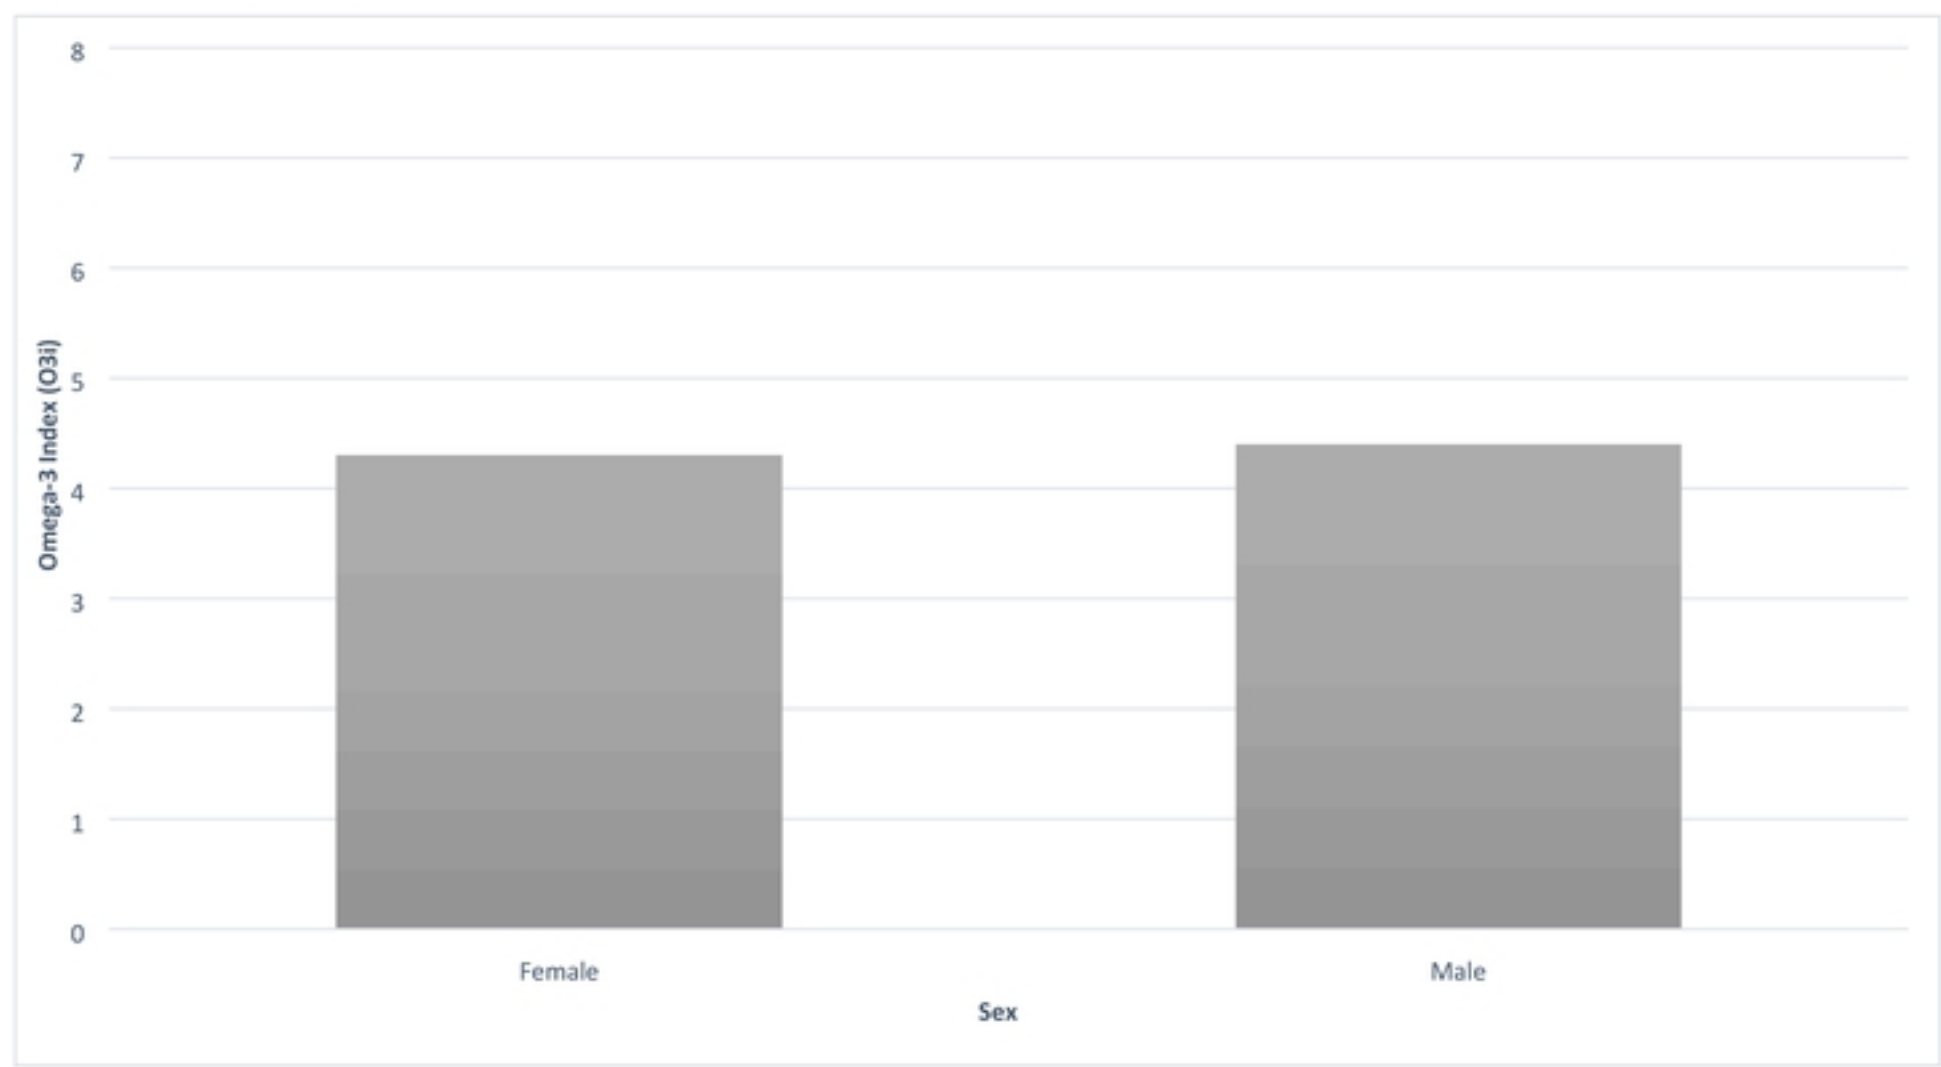

**Figure 5. Average Omega-3 Index between 5 Highest Participating Sports**

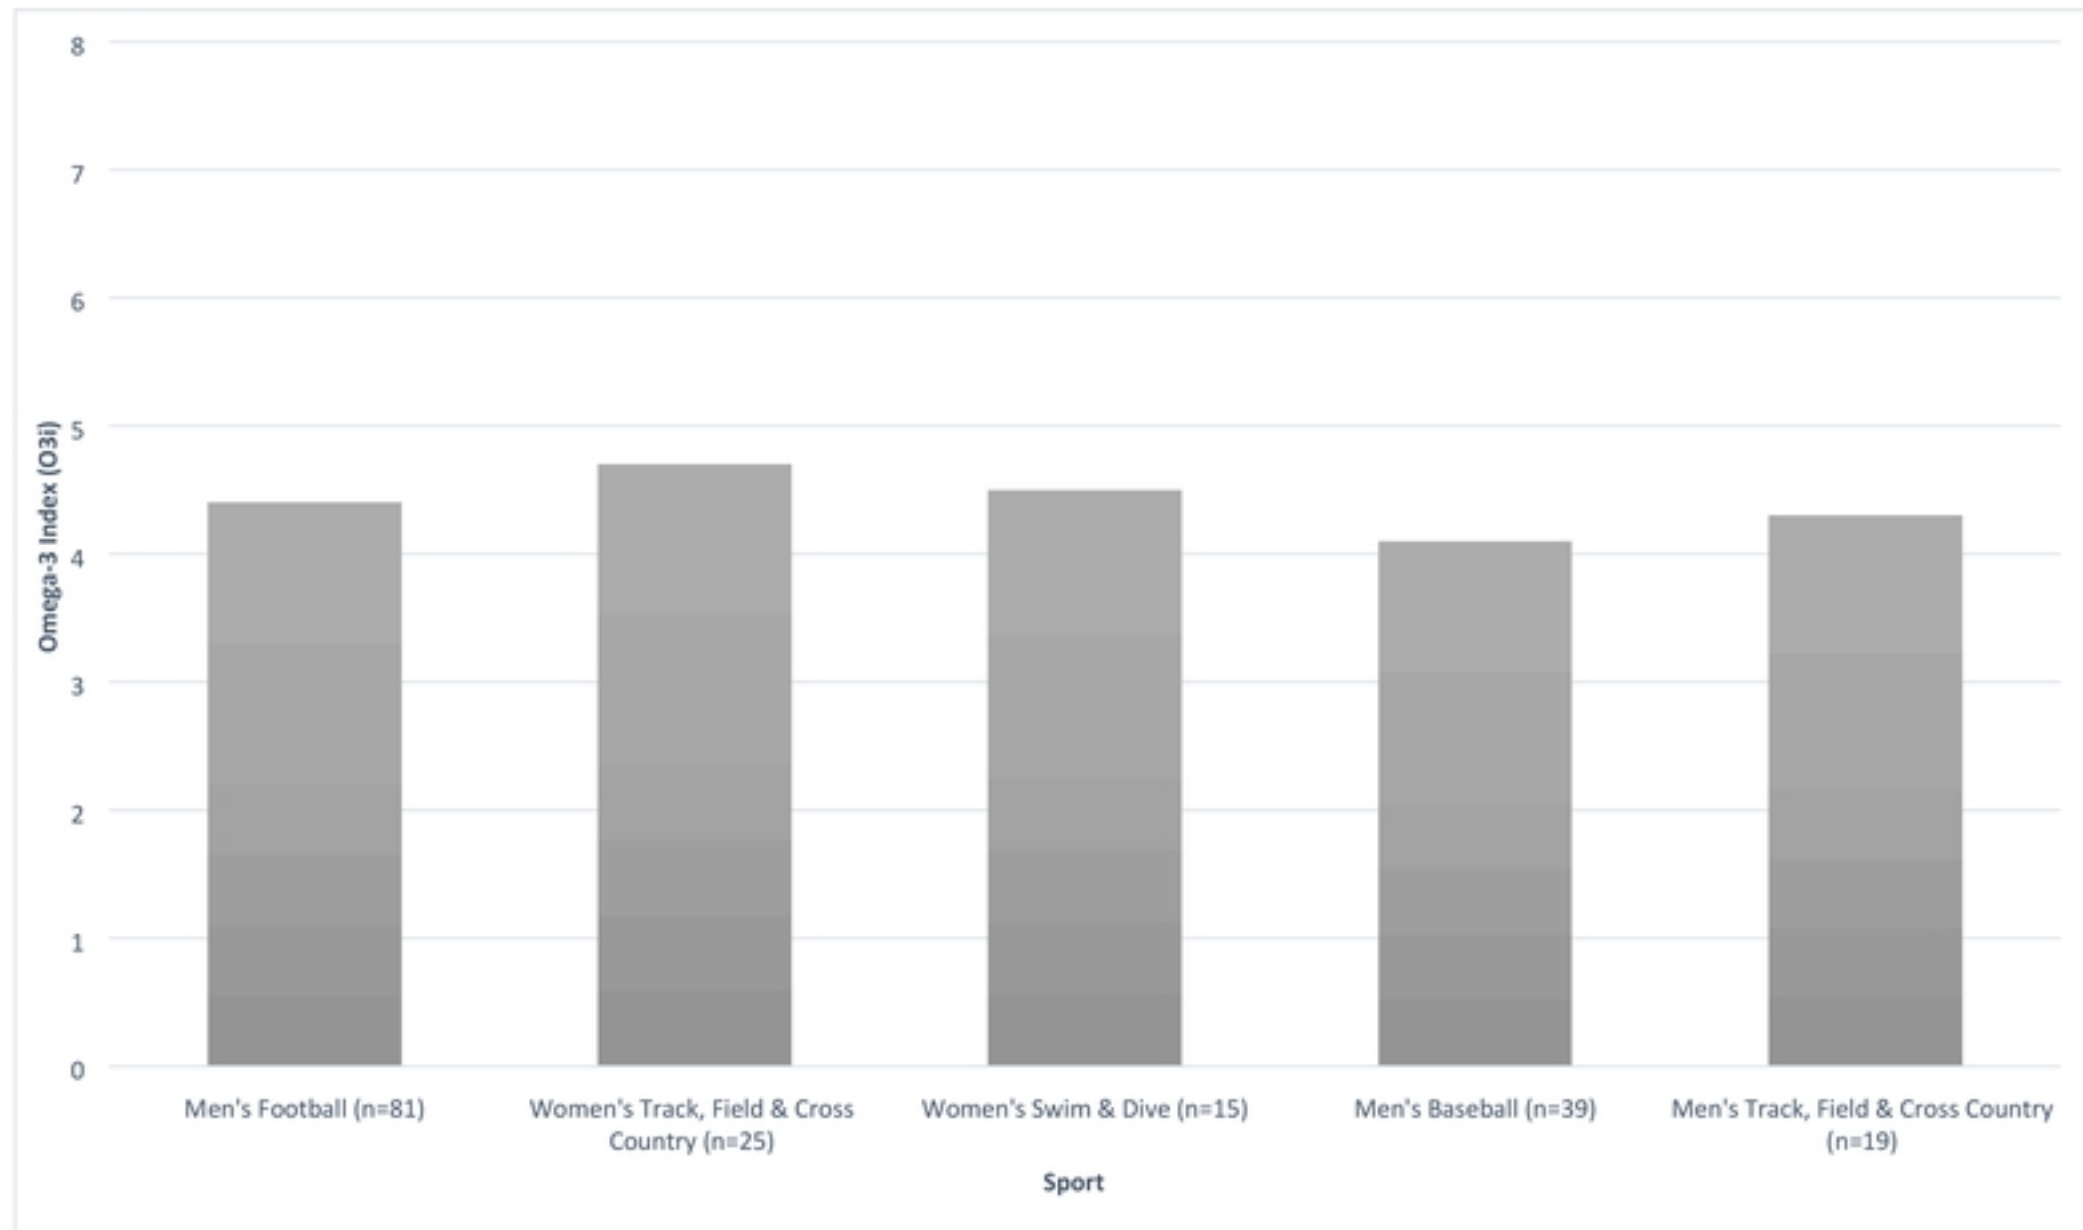



**Figure 6. Relationship between Fish or Seafood Meal Frequency and Omega-3 Index (n= 298)**

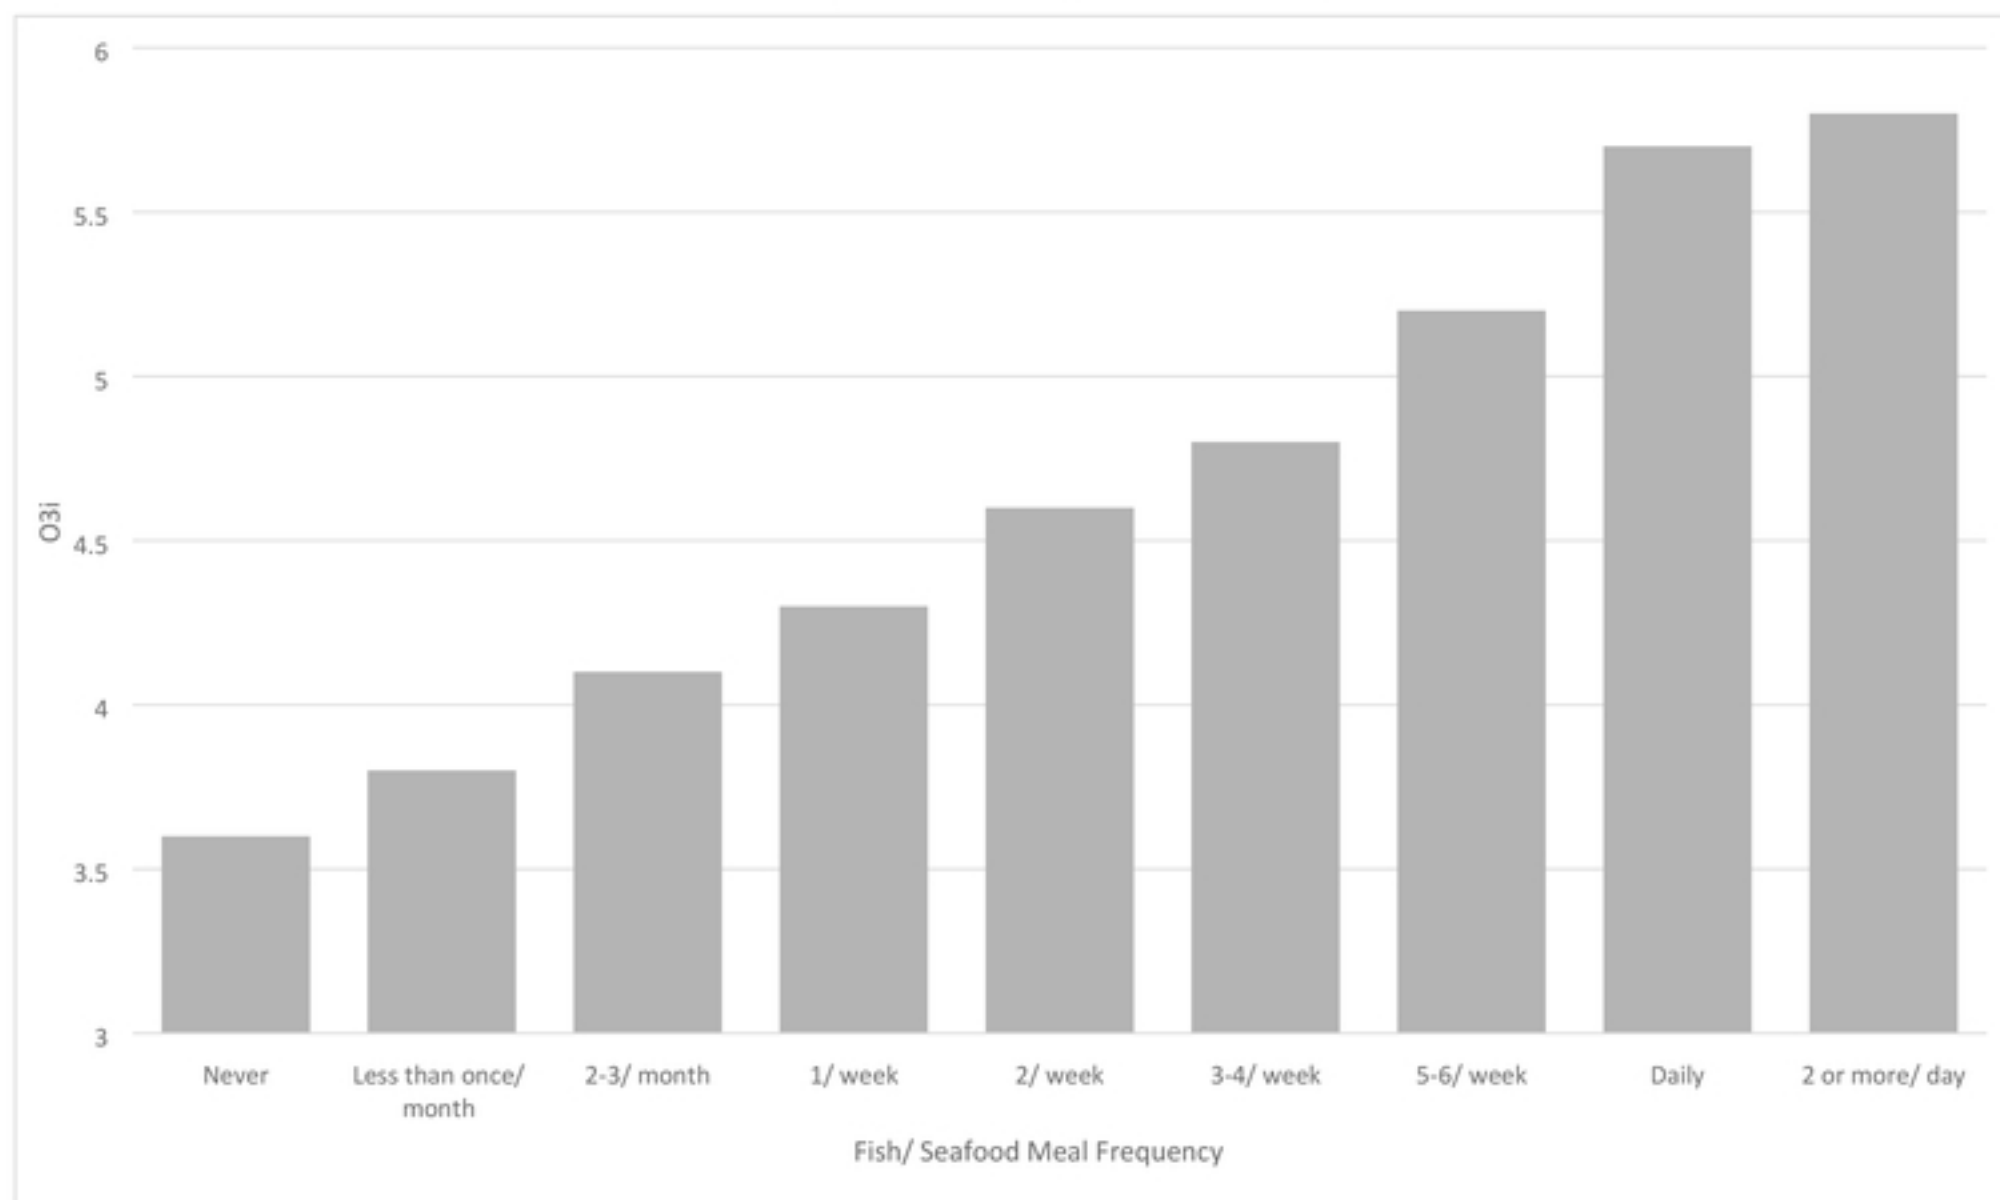

Source: https://www.biorxiv.org/content/biorxiv/early/2020/01/27/2020.01.27.920991.full.pdf
